# Supplementary material
Source: HighWire-hosted journal article supplement (https://erj.ersjournals.com/content/58/1/2100360)

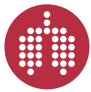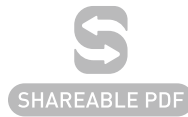

# The association between SARS-CoV-2 RT-PCR cycle threshold and mortality in a community cohort

Rupert Waudby-West<sup>1</sup>, Benjamin J. Parcell<sup>2</sup>, Colin N.A. Palmer<sup>1</sup>, Samira Bell <sup>1</sup>, James D. Chalmers<sup>3</sup> and Moneeza K. Siddiqui <sup>1</sup>

<sup>1</sup>Division of Population Health and Genomics, School of Medicine, University of Dundee, Dundee, UK. <sup>2</sup>Dept of Medical Microbiology, Ninewells Hospital and Medical School, Dundee, UK. <sup>3</sup>Division of Molecular and Clinical Medicine, School of Medicine, University of Dundee, Dundee, UK.

James D. Chalmers ([j.chalmers@dundee.ac.uk](mailto:j.chalmers@dundee.ac.uk))

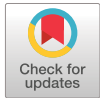

Shareable abstract (@ERSpublications)

**Ct values from RT-PCR tests are associated with risk of mortality in SARS-CoV-2 infection. Hazards of Ct values <20 compared to >30 were 2.20 (95% CI 1.28–3.76) in a model adjusted for age, sex, comorbidities and hospitalisation.** <https://bit.ly/3gjuqdU>

**Cite this article as:** Waudby-West R, Parcell BJ, Palmer CNA, *et al.* The association between SARS-CoV-2 RT-PCR cycle threshold and mortality in a community cohort. *Eur Respir J* 2021; 58: 2100360 [DOI: 10.1183/13993003.00360-2021].

This single-page version can be shared freely online.

Copyright ©The authors 2021.

This version is distributed under the terms of the Creative Commons Attribution Non-Commercial Licence 4.0. For commercial reproduction rights and permissions contact [permissions@ersnet.org](mailto:permissions@ersnet.org)

Received: 5 Feb 2021  
Accepted: 2 June 2021

*To the Editor:*

A coronavirus disease 2019 (COVID-19) diagnosis is widely made by the use of reverse transcription polymerase chain reaction (RT-PCR) testing for severe acute respiratory syndrome coronavirus 2 (SARS-CoV-2). When using RT-PCR, the infectivity of SARS-CoV-2 can be inferred from the threshold cycle (Ct) value [1]. It is best practice to confirm the validity of the standard curve using reference materials or in-house plasmid controls with known viral copy numbers [2]. As the Ct value represents the cycle number at which the signal breaches the threshold for positivity, a lower Ct value is indicative of a higher viral load. Although some studies suggest that viral load is associated with mortality and infectiousness [3, 4], a systematic review has identified little difference in viral load between pre-symptomatic, asymptomatic and symptomatic patients [5]. As a result, the clinical relevance of viral load remains controversial, and it is not used in clinical practice [6]. Here, we report the relationship between the Ct value and all-cause mortality for people who tested positive for SARS-CoV-2 on a combined nasal and pharyngeal swab in the Tayside region of Scotland, UK. This is a community cohort study and includes the local population of the region, as well as symptomatic health and social care workers tested as part of a screening programme [7]. In order to obtain clinical characteristics and outcomes for those who tested positive, anonymised record linkage was conducted between routine healthcare datasets as described previously [8]. All positive PCR tests from 12 March until 1 May, 2020 were included, and all deaths recorded by National Records Scotland until 20 May, 2020. Approval for anonymised data linkage was granted by the local Data Protection Officer (Caldicott Guardian).

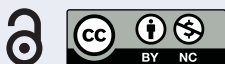

Supplement: inline-supplementary-material-1 [file inline-supplementary-material-1.pdf]
